# Supplementary material for: Complementing the topsoil information of the Land Use/Land Cover Area Frame Survey (LUCAS) with modelled N2O emissions
Source: PLOS journal article supplement (doi:10.1371/journal.pone.0176111), 2017-04-27
Supplement: S1 (10.1371/journal.pone.0176111.s001) [file journal.pone.0176111.s001]

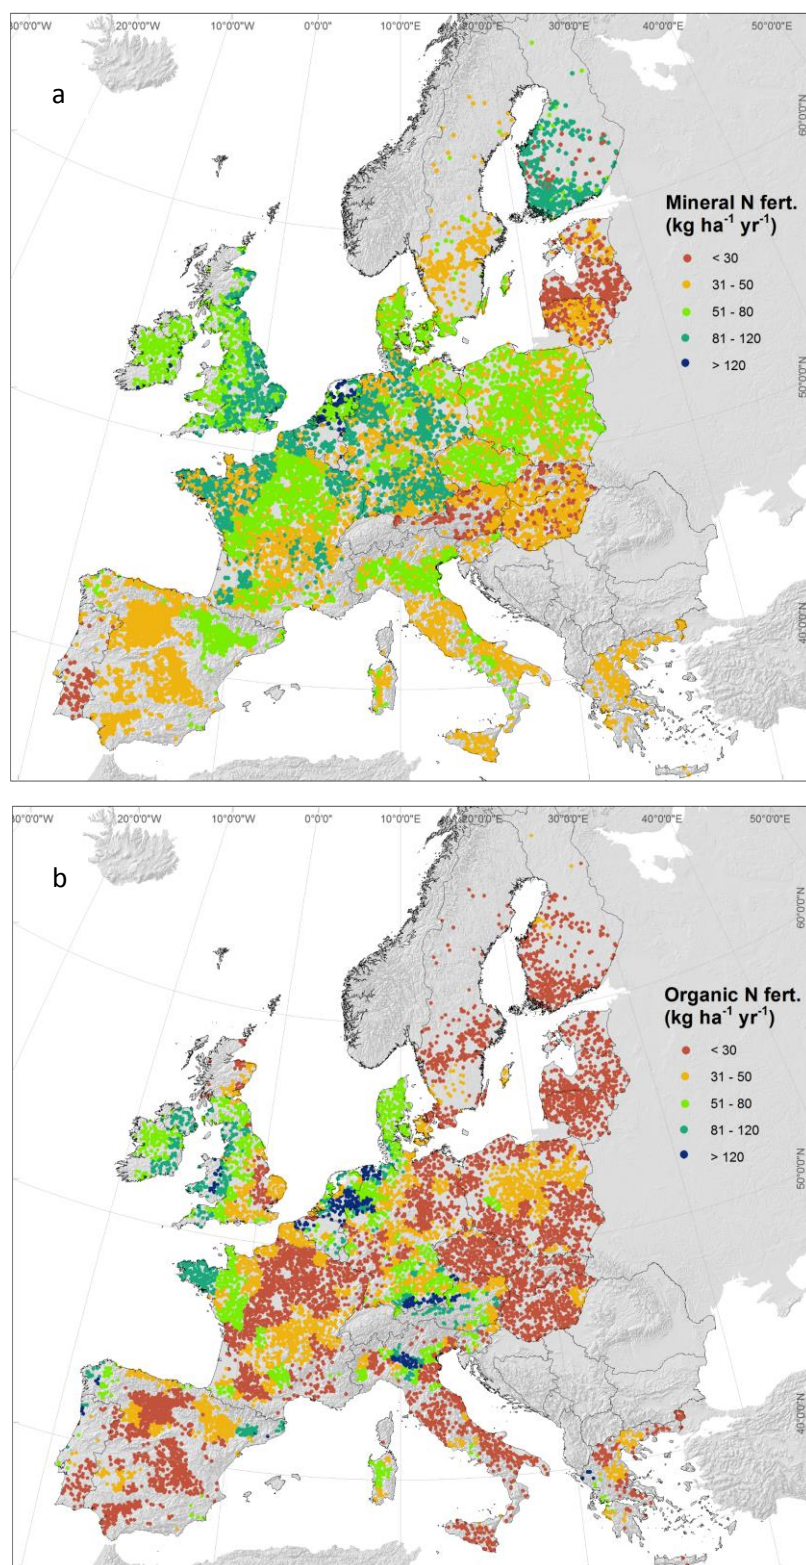

**S1 Fig** – Average (a) mineral and (b) organic N fertilization applied to LUCAS points. For the mineral fertilization, the values refer to the average N fertilization of the crop rotation since each crop (within the rotation) may have different rates based on agronomic requirement.
